# Supplementary material for: Scaffolds for Chondrogenic Cells Cultivation Prepared from Bacterial Cellulose with Relaxed Fibers Structure Induced Genetically
Source: MDPI journal article supplement (doi:10.3390/nano8121066), 2018-12-17
Supplement: s1 [file s1]

## Supplementary material

**Table S1** Sequences of DNA oligonucleotides used in PCR

| Primer        | Sequence (5'-3')              |
|---------------|-------------------------------|
| pTI-motAB_for | CGCGGATCCGTGACACGACCGACGACCTA |
| pTI_motAB_rev | CCCAAGCTTTCAGCGATCCGTCAGGCGGA |
| pTI_for       | AAAATCTTCTCTCATCCG            |
| pTI_rev       | ACACAGGAAACAGACCAT            |

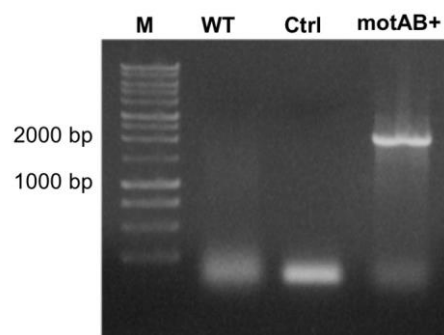

**Figure S1 Confirmation of *K. hansenii* ATCC 23769 strain transformation by colony PCR** with vector-specific primers (pTI\_for, pTI\_rev primers, Table S1). Empty vector (line Ctrl) was a source of product ~100 bp in length. Product of length ~2000 bp is of expected size for motAB insert cloned into pTI99A vector. Smear visible on the line WT and in the bottom of motAB+ line is due to unspecific amplification from genomic DNA. PCR was done without DNA isolation – directly on biomass from selective agar plate.

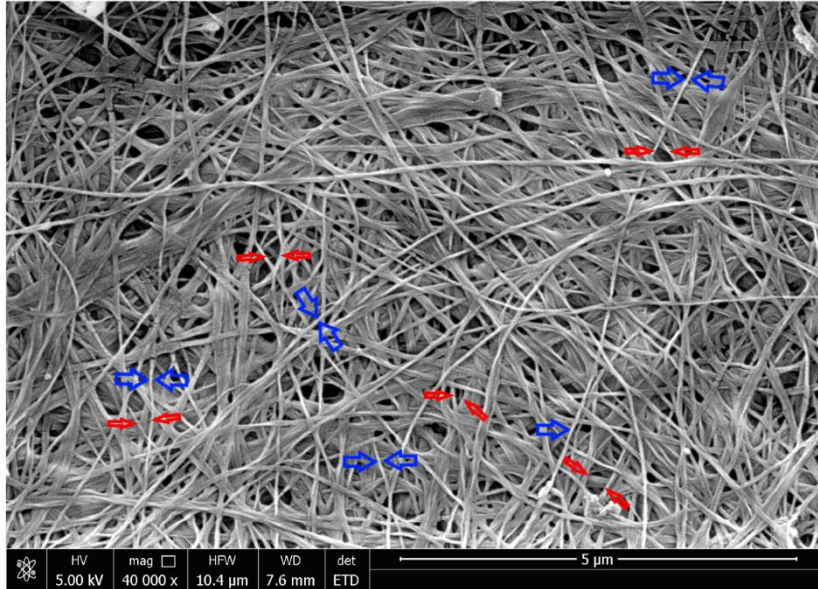

WT

**Figure S2. Example of fiber width and pore sizes estimation.** By the blue arrows exemplary fibers widths are shown, by red arrows exemplary pores dimensions are shown.

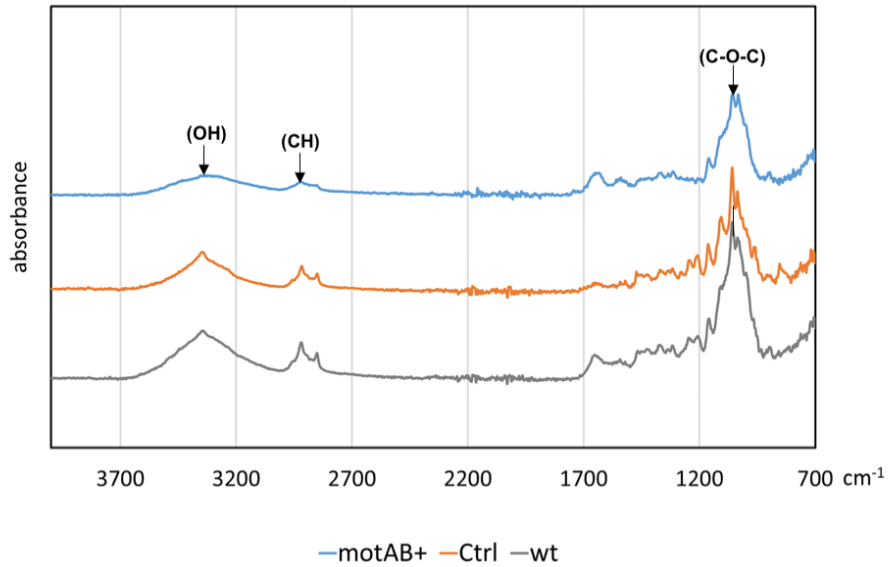

**Figure S3. FTIR spectra collected for freeze-dried membranes** produced by *K. hansenii* ATCC 23769 wild type strain and its variants: control (transformed with pTI99A vector) and mutant (motAB+ strain).

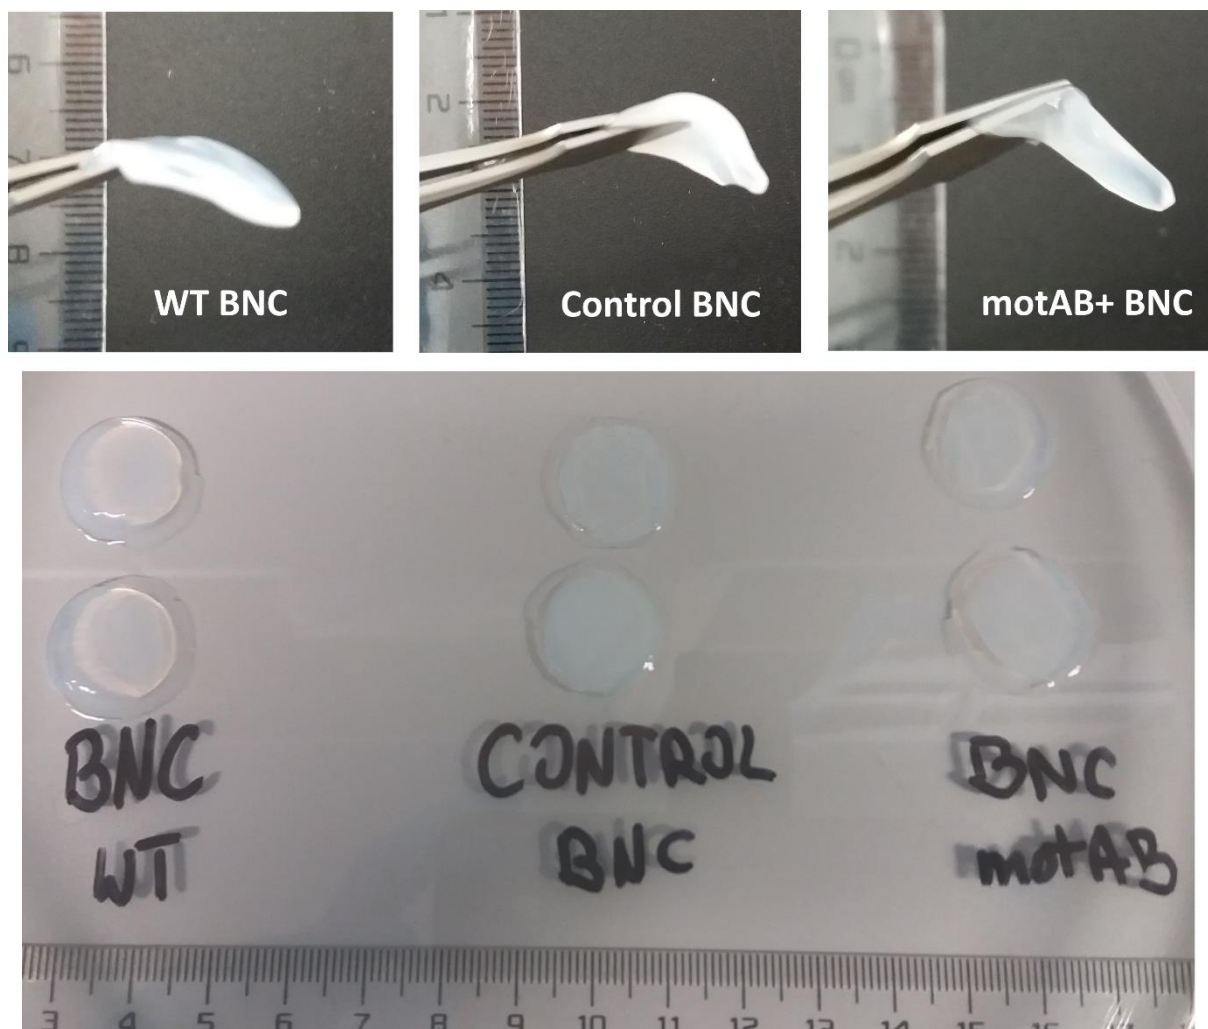

**Figure S4. Macroscopic appearance of BNC scaffolds used in the study. Membranes shown were harvested from 24-well plates and washed. After sterilization in fresh 24-well plate they were used for cells seeding (WT BNC = cellulose produced by a wild type *K. hansenii* ATCC 23769 strain; Control BNC = cellulose produced by a *K. hansenii* ATCC 23769 strain transformed with pTI99 vector; BNC motAB+ = cellulose produced by a mutant strain)**

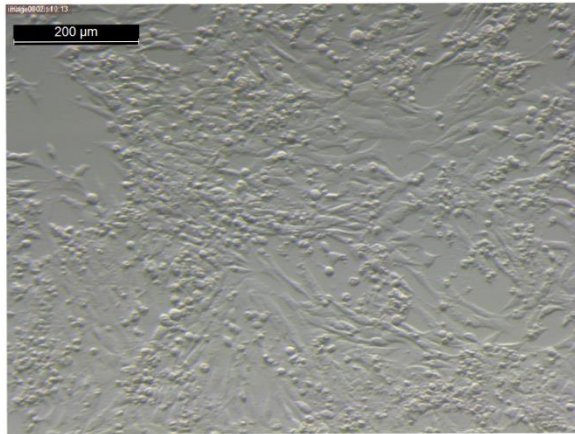

Plastic NDM

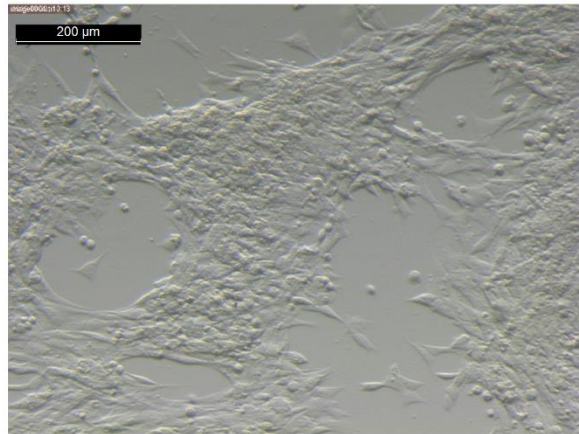

Plastic DM

**Figure S5. Morphology of ATDC5 cell line grown on 2D support** was observed under light M205 microscope, equipped with a Leica MC170 HD camera. Representative images (100× magnification) from 3-week long culture are shown.

**Plastic NDM** – cells cultured in Non-Differentiating (growth) medium (content given in Materials and Methods of the main body of article);

**Plastic DM** – cells cultured in differentiation medium (obtained by combination of DMEM/F12 with Insulin-Transferrin-Selenium (ITS, Thermo Fisher Scientific, MA, USA), 100 nM dexamethasone (Sigma Aldrich, MO, USA), 10 ng/ml transforming growth factor –  $\beta$  (Sigma Aldrich, MO, USA), and 50 mg/mL ascorbic acid (Avantor Performance Materials, Poland)).

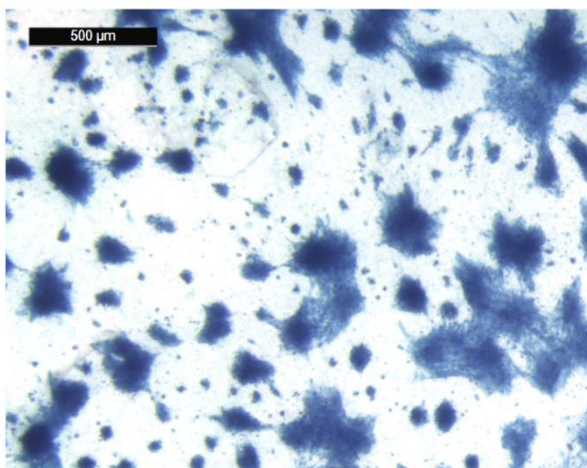

Control BNC

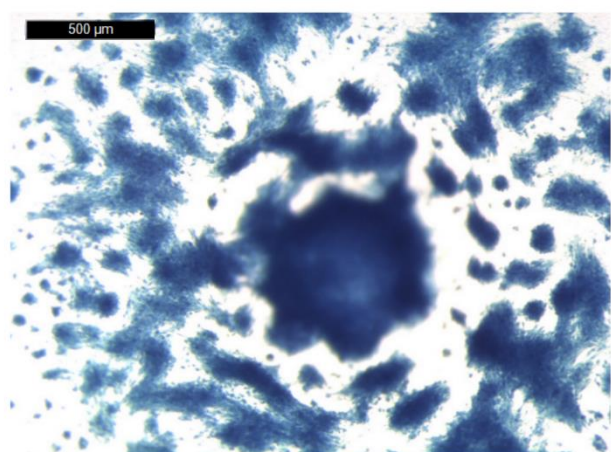

motAB+ BNC

**Figure S6. Morphology of ATDC5 cell line grown on BNC scaffolds, stained with Alcian blue**, was observed under light M205 microscope, equipped with a Leica MC170 HD camera. Representative images (100× magnification) from 3-week long culture are shown.
